# 1 Satellite Imaging of Global Urbanicity relate to Adolescent Brain Development and 2 Behavior

3 **Author names and affiliations:** Jiayuan Xu<sup>1,2</sup>, Xiaoxuan Liu<sup>3,4</sup>, Alex Ing<sup>2</sup>, Qiaojun Li<sup>5,2</sup>, Wen  
4 Qin<sup>1</sup>, Lining Guo<sup>1</sup>, Conghong Huang<sup>3,4</sup>, Jingliang Cheng<sup>6</sup>, Meiyun Wang<sup>7</sup>, Zuojun Geng<sup>8</sup>,  
5 Wenzhen Zhu<sup>9</sup>, Bing Zhang<sup>10</sup>, Weihua Liao<sup>11</sup>, Shijun Qiu<sup>12</sup>, Hui Zhang<sup>13</sup>, Xiaojun Xu<sup>14</sup>,  
6 Yongqiang Yu<sup>15</sup>, Bo Gao<sup>16</sup>, Tong Han<sup>17</sup>, Guangbin Cui<sup>18</sup>, Feng Chen<sup>19</sup>, Junfang Xian<sup>20</sup>, Jiance  
7 Li<sup>21</sup>, Jing Zhang<sup>22</sup>, Xinian Zuo<sup>23</sup>, Dawei Wang<sup>24</sup>, Wen Shen<sup>25</sup>, Yanwei Miao<sup>26</sup>, Fei Yuan<sup>27</sup>, Su  
8 Lui<sup>28</sup>, Xiaochu Zhang<sup>29</sup>, Kai Xu<sup>30</sup>, Longjiang Zhang<sup>31</sup>, Zhaoxiang Ye<sup>32</sup>, Tobias  
9 Banaschewski<sup>33</sup>, Gareth J. Barker<sup>34</sup>, Arun L.W. Bokde<sup>35</sup>, Erin Burke Quinlan<sup>2</sup>, Sylvane  
10 Desrivieres<sup>2</sup>, Herta Flor<sup>36,37</sup>, Antoine Grigis<sup>38</sup>, Hugh Garavan<sup>39</sup>, Penny Gowland<sup>40</sup>, Andreas  
11 Heinz<sup>41</sup>, Rüdiger Brühl<sup>42</sup>, Jean-Luc Martinot<sup>43</sup>, Eric Artiges<sup>44</sup>, Frauke Nees<sup>33,36</sup>, Dimitri  
12 Papadopoulos Orfanos<sup>38</sup>, Herve Lemaitre<sup>45</sup>, Tomáš Paus<sup>46</sup>, Luise Poustka<sup>47</sup>, Sarah Hohmann<sup>33</sup>,  
13 Juliane H. Fröhner<sup>48</sup>, Michael N. Smolka<sup>48</sup>, Henrik Walter<sup>41</sup>, Robert Whelan<sup>49</sup>, Ran Goldblatt<sup>50</sup>,  
14 Kevin Patrick<sup>51</sup>, Vince Calhoun<sup>52</sup>, Mulin JunLi<sup>53</sup>, Meng Liang<sup>54</sup>, Peng Gong<sup>3,4</sup>, Edward D  
15 Barker<sup>55</sup>, Nicholas Clinton<sup>56</sup>, Le Yu<sup>3,4</sup>, Chunshui Yu<sup>1,57\*</sup>, Gunter Schumann<sup>2,58\*</sup>, and the  
16 CHIMGEN and IMAGEN Consortia.

17  
18 <sup>1</sup> Department of Radiology and Tianjin Key Laboratory of Functional Imaging, Tianjin Medical  
19 University General Hospital, Tianjin 300052, P.R. China

20 <sup>2</sup> Centre for Population Neuroscience and Precision Medicine (PONS), Institute of Psychiatry,  
21 Psychology and Neuroscience, SGDP Centre, King's College London, London SE5 8AF,  
22 United Kingdom

23 <sup>3</sup> Ministry of Education Key Laboratory for Earth System Modeling, Department of Earth  
24 System Science, Tsinghua University, Beijing 100084, P.R. China

25 <sup>4</sup> Joint Center for Global Change Studies, Beijing 100875, P.R. China

26 <sup>5</sup> College of Information Engineering, Tianjin University of Commerce, Tianjin 300052, P.R.  
27 China

28 <sup>6</sup> Department of Magnetic Resonance Imaging, The First Affiliated Hospital of Zhengzhou  
29 University, 450052 Zhengzhou, China

30 <sup>7</sup> Department of Radiology, Zhengzhou University People's Hospital and Henan Provincial  
31 People's Hospital, 450003 Zhengzhou, China

- 32 <sup>8</sup> Department of Medical Imaging, The Second Hospital of Hebei Medical University, 050000
- 33 Shijiazhuang, China
- 34 <sup>9</sup> Department of Radiology, Tongji Hospital, Tongji Medical College, Huazhong University of
- 35 Science and Technology, 430030 Wuhan, China
- 36 <sup>10</sup> Department of Radiology, Drum Tower Hospital, Medical School of Nanjing University,
- 37 210008 Nanjing, China
- 38 <sup>11</sup> Department of Radiology, Xiangya Hospital, Central South University, 410008 Changsha,
- 39 China
- 40 <sup>12</sup> Department of Medical Imaging, The First Affiliated Hospital of Guangzhou University of
- 41 Chinese Medicine, 510405 Guangzhou, China
- 42 <sup>13</sup> Department of Radiology, The First Hospital of Shanxi Medical University, 030001 Taiyuan,
- 43 China
- 44 <sup>14</sup> Department of Radiology, The Second Affiliated Hospital of Zhejiang University, School of
- 45 Medicine, 310009 Hangzhou, China
- 46 <sup>15</sup> Department of Radiology, The First Affiliated Hospital of Anhui Medical University,
- 47 230022 Hefei, China
- 48 <sup>16</sup> Department of Radiology, Yantai Yuhuangding Hospital, 264000 Yantai, China
- 49 <sup>17</sup> Department of Radiology, Tianjin Huanhu Hospital, 300350 Tianjin, China
- 50 <sup>18</sup> Functional and Molecular Imaging Key Lab of Shaanxi Province & Department of
- 51 Radiology, Tangdu Hospital, the Military Medical University of PLA Airforce (Fourth Military
- 52 Medical University), 710038 Xi'an, China
- 53 <sup>19</sup> Department of Radiology, Hainan General Hospital, 570311 Haikou, China
- 54 <sup>20</sup> Department of Radiology, Beijing Tongren Hospital, Capital Medical University, 100730
- 55 Beijing, China
- 56 <sup>21</sup> Department of Radiology, The First Affiliated Hospital of Wenzhou Medical University,
- 57 325000 Wenzhou, China
- 58 <sup>22</sup> Department of Magnetic Resonance, Lanzhou University Second Hospital, 730050 Lanzhou,
- 59 China

- 60 <sup>23</sup> Department of Psychology, University of Chinese Academy of Sciences (CAS), 100049
- 61 Beijing, China
- 62 <sup>24</sup> Department of Radiology, Qilu Hospital of Shandong University, 250012 Jinan, China
- 63 <sup>25</sup> Department of Radiology, Tianjin First Center Hospital, 300192 Tianjin, China
- 64 <sup>26</sup> Department of Radiology, The First Affiliated Hospital of Dalian Medical University,
- 65 116011 Dalian, China
- 66 <sup>27</sup> Department of Radiology, Pingjin Hospital, Logistics University of Chinese People's Armed
- 67 Police Forces, 300162 Tianjin, China
- 68 <sup>28</sup> Department of Radiology, the Center for Medical Imaging, West China Hospital of Sichuan
- 69 University, 610041 Chengdu, China
- 70 <sup>29</sup> School of Life Sciences, University of Science & Technology of China, 230026 Hefei, China
- 71 <sup>30</sup> Department of Radiology, The Affiliated Hospital of Xuzhou Medical University, 221006
- 72 Xuzhou, China
- 73 <sup>31</sup> Department of Medical Imaging, Jinling Hospital, Medical School of Nanjing
- 74 University, 210002 Nanjing, China
- 75 <sup>32</sup> Department of Radiology, Tianjin Medical University Cancer Institute and Hospital, 300060
- 76 Tianjin, China
- 77 <sup>33</sup> Department of Child and Adolescent Psychiatry and Psychotherapy, Central Institute of
- 78 Mental Health, Medical Faculty Mannheim, Heidelberg University, Square J5, 68159
- 79 Mannheim, Germany;
- 80 <sup>34</sup> Department of Neuroimaging, Institute of Psychiatry, Psychology & Neuroscience, King's
- 81 College London, United Kingdom;
- 82 <sup>35</sup> Discipline of Psychiatry, School of Medicine and Trinity College Institute of Neuroscience,
- 83 Trinity College Dublin, Dublin, Ireland;
- 84 <sup>36</sup> Department of Cognitive and Clinical Neuroscience, Central Institute of Mental Health,
- 85 Medical Faculty Mannheim, Heidelberg University, Square J5, Mannheim, Germany;
- 86 <sup>37</sup> Department of Psychology, School of Social Sciences, University of Mannheim, 68131
- 87 Mannheim, Germany;

- 88 <sup>38</sup> NeuroSpin, CEA, Université Paris-Saclay, F-91191 Gif-sur-Yvette, France;
- 89 <sup>39</sup> Departments of Psychiatry and Psychology, University of Vermont, 05405 Burlington,
- 90 Vermont, USA;
- 91 <sup>40</sup> Sir Peter Mansfield Imaging Centre School of Physics and Astronomy, University of
- 92 Nottingham, University Park, Nottingham, United Kingdom;
- 93 <sup>41</sup> Charité – Universitätsmedizin Berlin, corporate member of Freie Universität Berlin,
- 94 Humboldt-Universität zu Berlin, and Berlin Institute of Health, Department of Psychiatry and
- 95 Psychotherapy, Campus Charité Mitte, Charitéplatz 1, Berlin, Germany
- 96 <sup>42</sup> Physikalisch-Technische Bundesanstalt (PTB), Abbestr. 2 - 12, Berlin, Germany;
- 97 <sup>43</sup> Institut National de la Santé et de la Recherche Médicale, INSERM Unit 1000
- 98 “Neuroimaging & Psychiatry”, University Paris Sud, University Paris Descartes - Sorbonne
- 99 Paris Cité; and Maison de Solenn, Paris, France;
- 100 <sup>44</sup> Institut National de la Santé et de la Recherche Médicale, INSERM Unit 1000
- 101 “Neuroimaging & Psychiatry”, University Paris Sud, University Paris Descartes - Sorbonne
- 102 Paris Cité; and Psychiatry Department 91G16, Orsay Hospital, France;
- 103 <sup>45</sup> Institut National de la Santé et de la Recherche Médicale, UMR 992 INSERM, CEA, Faculté
- 104 de médecine, Université Paris-Sud, Université Paris-Saclay, NeuroSpin, F-91191
- 105 Gif-sur-Yvette, France;
- 106 <sup>46</sup> Bloorview Research Institute, Holland Bloorview Kids Rehabilitation Hospital and
- 107 Departments of Psychology and Psychiatry, University of Toronto, Toronto, Ontario, M6A
- 108 2E1, Canada;
- 109 <sup>47</sup> Department of Child and Adolescent Psychiatry and Psychotherapy, University Medical
- 110 Centre Göttingen, von-Siebold-Str. 5, 37075, Göttingen, Germany;
- 111 <sup>48</sup> Department of Psychiatry and Neuroimaging Center, Technische Universität Dresden,
- 112 Dresden, Germany;
- 113 <sup>49</sup> School of Psychology and Global Brain Health Institute, Trinity College Dublin, Ireland;
- 114 <sup>50</sup> School of Global Policy and Strategy, International Lane, University of California San
- 115 Diego, San Diego, CA 92093;

116 <sup>51</sup> Center for Wireless and Population Health Systems, Department of Family and Preventive  
117 Medicine and Calit2's Qualcomm Institute, University of California, San Diego, 9500 Gilman  
118 Drive, Dept. 0811, La Jolla, CA 92093-0811;

119 <sup>52</sup> Tri-institutional Center for Translational Research in Neuroimaging and Data Science  
120 (TReNDS) [Georgia State University, Georgia Institute of Technology, Emory University],  
121 Atlanta, GA 30303

122

123 <sup>53</sup> Collaborative Innovation Center of Tianjin for Medical Epigenetics, Tianjin Key Laboratory  
124 of Medical Epigenetics, Department of Pharmacology, Tianjin Medical University, Tianjin  
125 300052, P.R. China.

126 <sup>54</sup> School of Medical Imaging and Tianjin Key Laboratory of Functional Imaging, Tianjin  
127 Medical University, Tianjin 300052, P.R. China

128 <sup>55</sup> Department of Psychology, Institute of Psychiatry, Psychology and Neuroscience, King's  
129 College London, London SE5 8AF, United Kingdom

130 <sup>56</sup> Google, Inc., 1600 Amphitheatre Parkway, Mountain View, CA 94043, USA

131 <sup>57</sup> CAS Center for Excellence in Brain Science and Intelligence Technology, Chinese Academy  
132 of Sciences, Shanghai, 200031, P.R. China

133 <sup>58</sup> Population Neuroscience and Precision Medicine (PONS) LIN-Charite Research Group  
134 Dept. of Psychiatry and Psychotherapy, Charite, CCM, Humboldt University, Berlin, Germany  
135 and Institute for Science and Technology of Brain-inspired Intelligence (ISTBI), Fudan  
136 University, Shanghai, P.R. China.

137

138

139

140 **\*Correspondence to:**

141 Professor Gunter Schumann, M.D., Ph.D., Centre for Population Neuroscience and Precision  
142 Medicine (PONS), Institute of Psychiatry, Psychology and Neurosciences, SGDP-Centre, 16  
143 De Crespigny Park, London SE58AF, UK.

144 E-mail: [gunter.schumann@kcl.ac.uk](mailto:gunter.schumann@kcl.ac.uk)

145 and  
146 Professor Chunshui Yu, Ph.D., Department of Radiology, Tianjin Medical University General  
147 Hospital, No. 154, Anshan Road, Heping District, Tianjin 300052, China.  
148 E-mail: [chunshuiyu@tmu.edu.cn](mailto:chunshuiyu@tmu.edu.cn)  
149  
150

# 151    **Abstract**

152    Urbanicity, the impact of living in urban areas, is among the greatest environmental challenges  
 153    for mental health. While urbanicity might be distinct in different sociocultural conditions and  
 154    geographic locations, there are likely to exist common features shared in different areas of the  
 155    globe. Understanding these common and specific relations of urbanicity with human brain and  
 156    behavior will enable to assess the impact of urbanicity on mental disorders, especially in  
 157    childhood and adolescence, where prevention and early interventions are likely to be most  
 158    effective.

159        We constructed from satellite-based remote sensing data a factor for urbanicity that was  
 160    highly correlated with population density ground data. This factor, 'UrbanSat' was utilized in  
 161    the Chinese CHIMGEN sample (N=831) and the longitudinal European IMAGEN cohort  
 162    (N=810) to investigate if exposure to urbanicity during childhood and adolescence is associated  
 163    with differences in brain structure and function in young adults, and if these changes are linked  
 164    to behavior.

165        Urbanicity was found negatively correlated with medial prefrontal cortex volume and  
 166    positively correlated with cerebellar vermis volume in young adults from both China and  
 167    Europe. We found an increased correlation of urbanicity with functional network connectivity  
 168    within- and between- brain networks in Chinese compared to European participants. Urbanicity  
 169    was highly correlated with a measure of perceiving a situation from the perspective of others, as  
 170    well as symptoms of depression in both datasets. These correlations were mediated by the  
 171    structural and functional brain changes observed. Susceptibility to urbanicity was greatest in  
 172    two developmental windows during mid-childhood and adolescence.

173        Using innovative technology, we were able to probe the relationship between urban  
 174    upbringing with brain change and behavior in different sociocultural conditions and geographic  
 175    locations. Our findings help to identify shared and distinct determinants of adolescent brain  
 176    development and mental health in different regions of the world, thus contributing to targeted  
 177    prevention and early-intervention programs for young people in their unique environment. Our  
 178    approach may be relevant for public health, policy and urban planning globally.

## 179     **Introduction**

180     Mental disorders account for 28% of disease burden among non-communicable diseases<sup>1</sup>.  
 181     Environmental factors account for up to 50% of the attributable risk for mental disorders<sup>2</sup>. The  
 182     environmental measures investigated in mental health research are generally limited to  
 183     individual life events<sup>3</sup>, such as trauma, abuse, neglect, or psychosocial stress. While the impact  
 184     of these individual life events on brain development and behavior is actively investigated<sup>4</sup>, the  
 185     influence of the physical environment, and its social consequences, such as urbanization and  
 186     urbanicity, on mental health is less well studied.

187             Urbanicity can be defined as the impact of living in urban areas at a given time, and  
 188     refers to the presence of conditions that are particular to urban areas or present to a much  
 189     greater extent than in nonurban areas<sup>5</sup>. Urbanicity and urbanization are among the greatest  
 190     environmental challenges globally. Whereas in 1950, less than 30% of the world's population  
 191     lived in urban areas, this number has increased to presently 55% and is expected to rise to 68%  
 192     in 2050<sup>6</sup>. Moreover, environmental impacts of urbanicity are thought to be the most rapidly  
 193     growing cause for mental illness<sup>7</sup>. While Europe is among the most stable urbanized regions,  
 194     Asia is home to 54% of the world's urban population and subject to massive demographic  
 195     changes: for example, by 2050 China will have added 255 million urban dwellers<sup>8</sup>. While there  
 196     are likely to exist common environmental factors related to urbanicity that are shared, there  
 197     may also be distinct influences in China and Europe that affect people differently and at  
 198     different times during the lifespan<sup>9</sup>.



199 As 75% of the lifetime burden from mental disorders emerges by age 20 years<sup>10</sup>, the  
 200 adverse impact of urbanicity can be best addressed and managed in childhood and adolescence.  
 201 However, data relating urbanicity to mental health have been mainly ascertained in adults, thus  
 202 our knowledge on how it affects young people is very limited. For example, urbanization may  
 203 affect brain function in adults<sup>11</sup>, but there are no such data available for children and  
 204 adolescents whose continuing brain development renders them particularly susceptible to  
 205 modifying environmental influences.

206 To facilitate comparative analyses of urbanicity globally, we require common  
 207 quantitative and longitudinal environmental measures that are ascertained frequently and are  
 208 identical across different geographic locations and sociocultural conditions. Remote sensing  
 209 satellite data, having been continuously recorded since the early 1970's, provide globally  
 210 applicable, standardized quantitative environmental measures that enable the continuous  
 211 tracing of environmental influences going back more than 50 years<sup>12</sup>. Therefore, we were  
 212 interested in developing satellite data features that are suitable measures for urbanicity in  
 213 Europe and China. Using these data we then aimed to investigate the relation of urbanicity with  
 214 structural and functional brain measures in two behavioral neuroimaging datasets of young  
 215 people: the Chinese CHIMGEN study ([www.chimgen.tmu.edu.cn](http://www.chimgen.tmu.edu.cn)) and the European  
 216 longitudinal IMAGEN cohort ([www.imagen-europe.com](http://www.imagen-europe.com))<sup>13</sup>. We tested whether structural and  
 217 functional brain differences related to urbanicity are similar or distinct in Chinese and  
 218 European participants, and investigated possible susceptibility windows for the effects of  
 219 urbanicity during child and adolescent development.

220

221

## 222 **Results**

### 223 **Development of a remote sensing satellite measure of urbanicity (UrbanSat)**

224 To develop a satellite-based measure of urbanicity, we carried out a confirmatory factor  
 225 analysis (CFA) in CHIMGEN (n=3336) and IMAGEN (n=1205), identifying a latent factor  
 226 derived from measures relevant for urbanicity, including nighttime lights<sup>15</sup>, NDVI<sup>16</sup>, NDBI<sup>17</sup>,  
 227 NDWI<sup>18</sup> and global land cover mapping<sup>19</sup>. We then validated this factor, which we termed  
 228 UrbanSat, by calculating correlations with ground-level population density data from  
 229 GHSL-POP<sup>14</sup>, which were available for both China and Europe for the years 1990, 2000 and  
 230 2015. UrbanSat showed very high correlations with ground-level population grid data in rural,  
 231 town, city and overall livings, indicating its robustness across time during rapid changes of  
 232 urbanicity and across countries in Asia and Europe (CHIMGEN:  $r=0.697$ ,  $P=1.76 \times 10^{-143}$  in  
 233 1990; CHIMGEN:  $r=0.712$ ,  $P=4.90 \times 10^{-196}$  in 2000;  $r=0.722$ ,  $P=5.64 \times 10^{-197}$  in 2015;  
 234 IMAGEN:  $r=0.715$ ,  $P=5.27 \times 10^{-189}$  in 2000-2015; Figure 1).

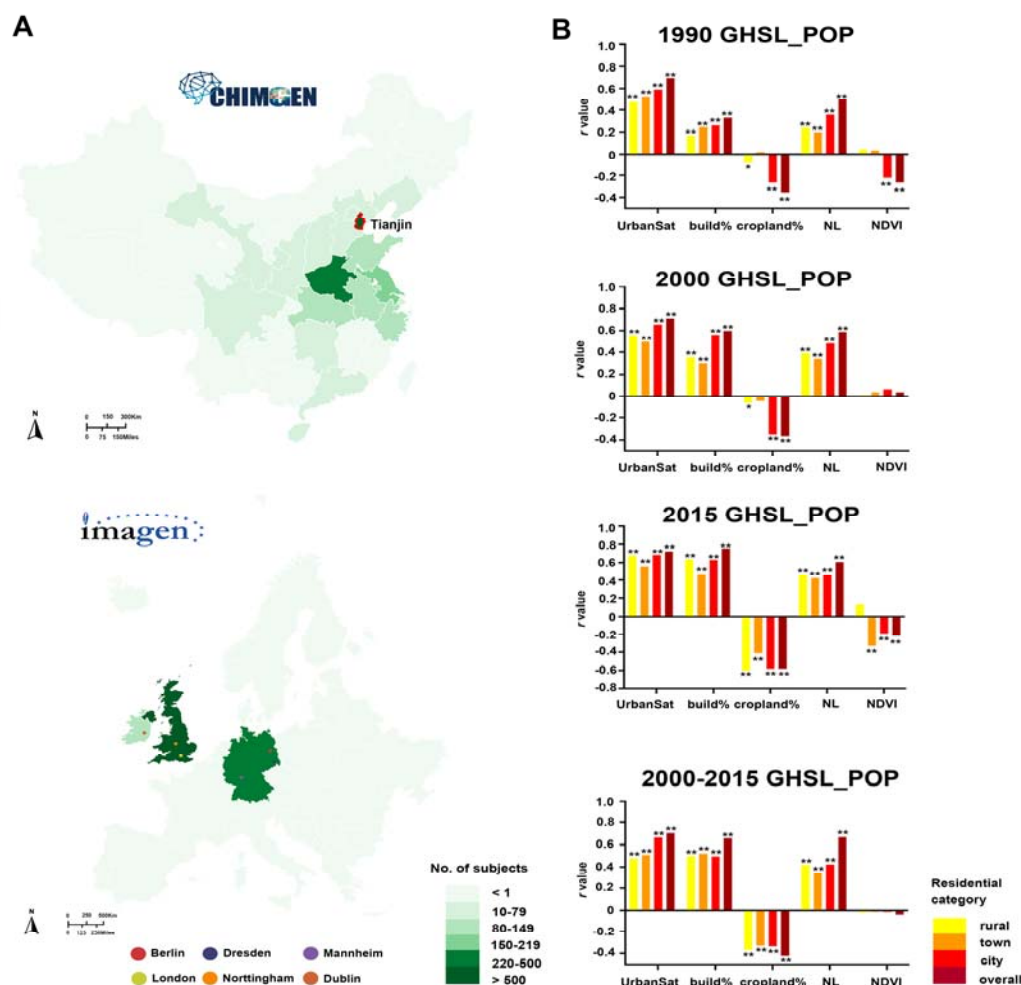

235

236 **Figure 1. Spatial distribution of subjects in the (A) CHIMGEN (N=3336) and (B) IMAGEN**  
 237 **(N=1025) studies.** A. The maps showed the numbers of subjects' distribution from each  
 238 recruitment center in CHIMGEN and IMAGEN. CHIMGEN Tianjin main center is marked; B.  
 239 The bars plots show correlations between each satellite feature (UrbanSat, percentage of  
 240 urban build-up, percentage of cropland, nighttime light and NDVI) and ground-level GHSL  
 241 population density grid in rural, town, city and overall livings for the years 1990, 2000 and  
 242 2015 in CHIMGEN (Top 3). In IMAGEN, we selected only participants who remained at the  
 243 same address (geoposition) between 2009 and 2015. We therefore used the average population  
 244 grid between the years 2000 and 2015 (the last one); GHSL\_POP, Population density grid of  
 245 Global Human Settlement Layers; NL, nighttime light. \*  $P < 0.05$ ; \*\*  $P < 0.001$ .

# 246 The relation of UrbanSat with brain gray matter volume and white-matter 247 microstructure.

248 We first tested the correlation of UrbanSat with brain gray matter volume (GMV) in 831  
249 participants from the CHIMGEN (23.81±0.82 years) (Supplementary Table S1) for whom  
250 geopositioned data were available since birth. We found a negative correlation of UrbanSat  
251 with left medial prefrontal cortex (mPFC) volume (MNI-coordinate: x=-3, y=45, z=27; 4180  
252 voxels;  $F$  value peak=-6.53; Figure 2A) and a positive correlation with cerebellar vermis  
253 volume (MNI-coordinate: x=-4.5, y=-58.5, z=-10.5; 678 voxels;  $F$  value peak=5.71; Figure  
254 2A) (FWE-correction, voxel  $P<0.05$ , cluster-size>100 voxels).

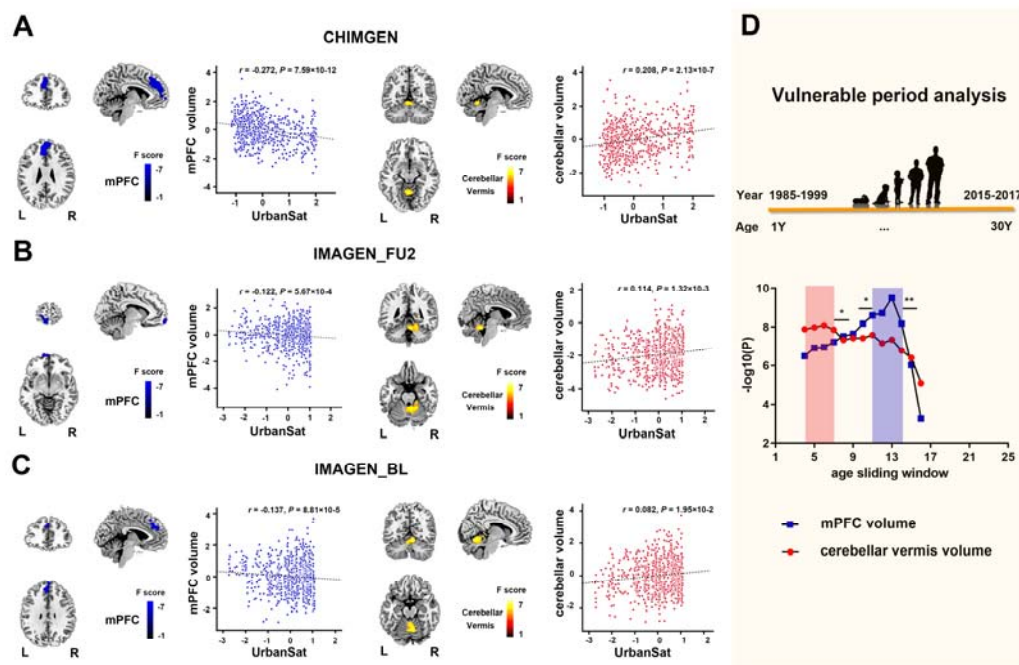

255  
256 **Figure 2. Voxel wise correlation between UrbanSat and GMV across the whole brain.** A. In  
257 the CHIMGEN sample (N=831), there was a significant negative correlation of the average  
258 exposure to urbanicity (measured by UrbanSat before age 18 years) with left mPFC volume  
259 (left) and a significant positive correlation with cerebellar vermis volume (right)  
260 (FWE-correction, voxel  $P<0.05$ ); B. In the IMAGEN sample at 19 years(N=791), there was

261 also a significant negative correlation of UrbanSat at 19 years with left mPFC volume (left)  
 262 and a significant positive correlation with cerebellar vermis volume (right) (FWE-correction,  
 263 voxel  $P < 0.05$ ); C. The correlations of UrbanSat on brain GMV changes in the left mPFC  
 264 volume (left) and the cerebellar vermis volume (right) were also present in the IMAGEN  
 265 baseline sample at 14 years (FWE-correction, voxel  $P < 0.05$ ); D. The correlation of  
 266 longitudinal UrbanSat with the left mPFC volume was highest during adolescence (ages 11 to  
 267 14 years). The difference to the adjacent age bands was significant compared to age 10 years  
 268 ( $P = 0.012$ ) and to age 15 years ( $P = 2.36 \times 10^{-5}$ ); The correlation of longitudinal UrbanSat with  
 269 cerebellar vermis volume was highest during childhood (ages 4 to 7 years). The difference to  
 270 the adjacent age bands was significant at  $P = 0.016$  compared to age 8 years; BL, baseline  
 271 datasets at 14 years old; FU2, follow up 2 datasets at 19 years old; L, left; mPFC, medial  
 272 prefrontal cortex; R, right; \*  $P < 0.05$ ; \*\*  $P < 0.001$ .

273

274 We observed similar results in the ground-level Chinese population grid data<sup>14</sup>, thus  
 275 validating the effect of urbanicity obtained by satellite measures on brain volume  
 276 (Supplementary Figure S1). To replicate our findings in a European sample, we carried out a  
 277 similar voxel-wise multiple regression analysis in 791 adolescents from the IMAGEN at age 19  
 278 ( $19.00 \pm 0.71$  years) (Supplementary Table S1). UrbanSat also showed a negative correlation of  
 279 UrbanSat with left mPFC volume (MNI-coordinate:  $x = -7.5$ ,  $y = 67.5$ ,  $z = -13.5$ ; 460 voxels;  
 280  $F$ -value peak = 5.71) and a positive correlation with cerebellar vermis volume  
 281 (MNI-coordinate:  $x = -5.5$ ,  $y = -59.5$ ,  $z = -9.5$ ; 876 voxels;  $F$  value peak = 5.65; Figure 2C)  
 282 (FWE-correction, voxel  $P < 0.05$ , cluster-size > 100 voxels), thus replicating the findings from  
 283 CHIMGEN. Our findings indicate that the observed correlation between UrbanSat and GMV  
 284 was independent of geographical locations and socio-cultural conditions.

285 We then investigated potential susceptibility periods during which exposure to urbanicity  
 286 may have the strongest influence on brain GMV. In the CHIMGEN young adults, for whom

geoposition data were available since birth, we created age sliding windows by averaging UrbanSat for each subject over a period of three years and measured correlations between the exposure to urbanicity in the resulting windows and GMV. The periods showing the greatest susceptibility to urbanicity were childhood (age 4 to 7 years) and adolescence (age 11 and 14 years) (Figure 2B). During childhood, we observed significantly higher correlation of urbanicity with cerebellar vermis volume. While the correlation of longitudinal UrbanSat with the left mPFC volume was highest during adolescence (FWE-correction, voxel  $P < 0.05$ , see Supplementary Results).

While neuroimaging measures in CHIMGEN were acquired once during young adulthood, neuroimaging measures in IMAGEN were acquired twice, during adolescence at 14 years and in a follow-up assessment during early adulthood at 19 years. To further explore susceptibility periods of GMV to the exposure to urbanicity in IMAGEN participants, we analyzed the same individuals at age 14 years ( $14.05 \pm 0.75$  years). We confirmed the negative correlation with left mPFC volume (MNI-coordinate:  $x = -1.5$ ,  $y = 58.5$ ,  $z = 33$ ; 981 voxels;  $F$  value peak =  $-5.64$ ) and the positive correlation of UrbanSat with cerebellar vermis volume (MNI-coordinate:  $x = 6$ ,  $y = -55.5$ ,  $z = -10.5$ ; 2327 voxels;  $F$ -value peak =  $5.04$ ; Figure 2D) (FWE-correction, voxel wise  $P < 0.05$ , cluster-size  $> 100$  voxels).

We next investigated the correlation of UrbanSat with white-matter microstructure using tract-based spatial statistics analysis of diffusion tensor imaging (DTI) neuroimaging data. We did not find any significant correlation of UrbanSat with brain fractional anisotropy in either CHIMGEN or IMAGEN (FWE and TFCE-correction, voxel wise  $P < 0.05$ ).

### **The relation of UrbanSat with functional network connectivity within- and between-brain networks**

To investigate the shared and distinct relations of urbanicity with brain activity of cognitive processes in China and Europe, we tested the association of UrbanSat with functional network

connectivity (FNC) of 17 within-networks and 136 (17\*16/2) between-networks (Figure 3A and Supplementary Methods). In CHIMGEN (N=827), a voxel-wise multiple regression analysis controlling for age, gender and sites revealed a negative correlation of UrbanSat with FNC within the left mPFC of the anterior default mode network (aDMN) (MNI-coordinate: x=6, y=33, z=57; 130 voxels; *F*-value peak=-4.96) and a positive correlation with FNC within the left lingual gyrus of the medial visual network (mVN) (MNI-coordinate: x=-6, y=-84, z=-6; 144 voxels; *F*-value peak=5.21; Figure 3B) (FWE-correction, voxel *P*<0.05, cluster-size>100 voxels). In IMAGEN at 19 years (N=614), UrbanSat showed a negative correlation with FNC within the left mPFC of aDMN (MNI-coordinate: x=-3, y=63, z=6; 106 voxels; *F*-value peak=-4.83; Figure 3D), but not in mVN (FWE-correction, voxel *P*<0.05, cluster-size>100 voxels). The FNC-findings in CHIMGEN and IMAGEN were consistent with the brain GMV changes, indicating that UrbanSat affects both structure and function of the mPFC.



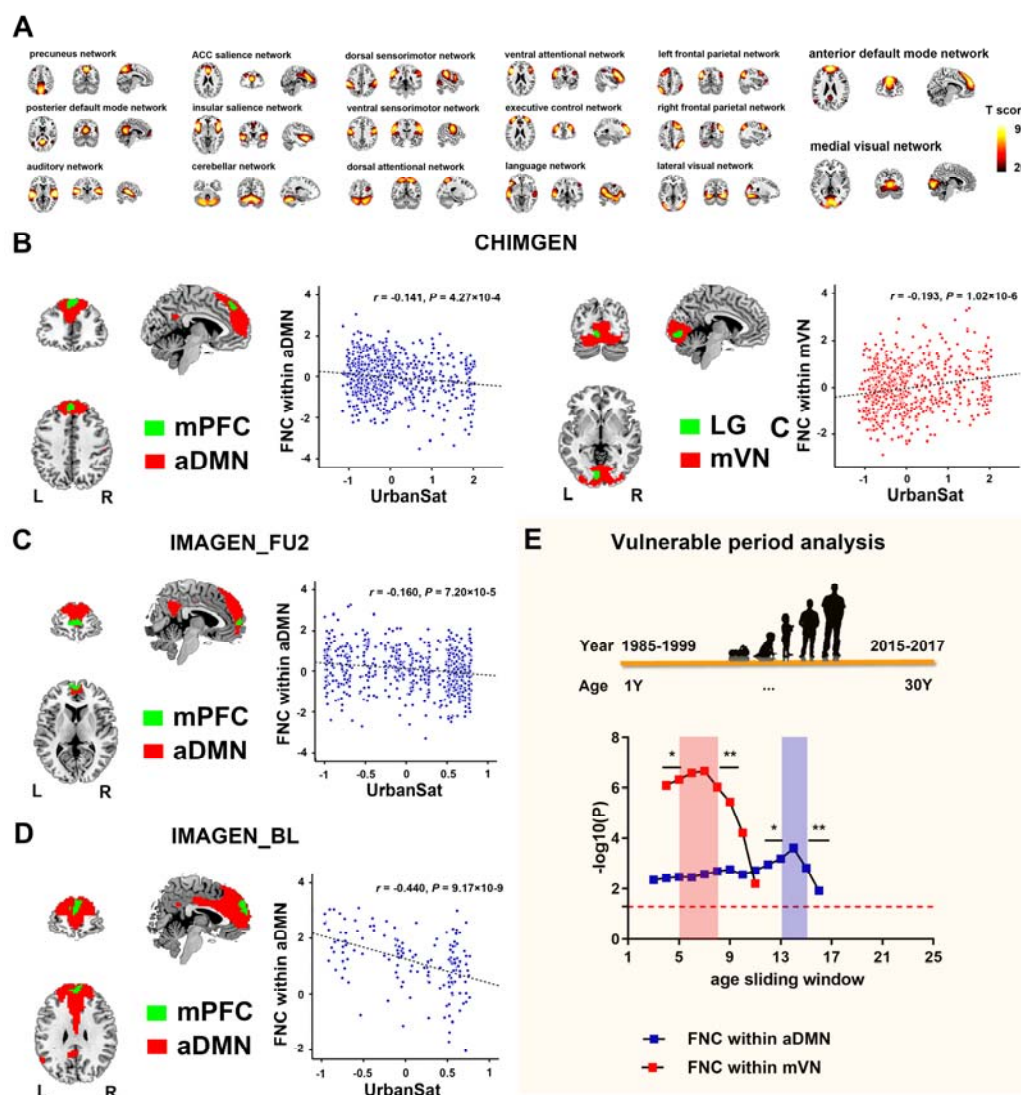

**Figure 3. Voxel wise correlations between UrbanSat and FNC within brain networks.** A. 17 independent resting state functional networks identified by independent component analysis in the CHIMGEN sample; B. In the CHIMGEN sample ( $N=827$ ), there was a significant negative correlation of UrbanSat before age 18 years with FNC within the left mPFC of the aDMN (left) and a significant positive correlation with FNC within the left LG of the mVN (right) (FWE-correction, voxel  $P<0.05$ ); C. In the IMAGEN at age 19 years ( $N = 614$ ), there was also a significant negative correlation of UrbanSat at 19 years with FNC within the aDMN (FWE-correction, voxel  $P<0.05$ ) (but not with FNC within the left LG of the mVN); D. The correlation of UrbanSat on FNC within the aDMN was also present in the IMAGEN at 14 years (FWE-correction, voxel  $P<0.05$ ). E. The correlation of UrbanSat with FNC within the aDMN was highest during adolescence (ages 13 to 15 years). The difference to the adjacent age bands was significant compared to age 12 years ( $P=0.010$ ) and to age 16 years ( $P=6.16 \times 10^{-5}$ ); The



correlation of UrbanSat with FNC within the mVN was only vulnerable in childhood and highest during childhood (ages 5 to 8 years). The difference to the adjacent age bands was significant at  $P=0.027$  compared to 4 years and  $P=2.68 \times 10^{-4}$  compared to age 9 years; aDMN, anterior default mode network; FNC, functional network connectivity; L, left; LG, lingual gyrus; mPFC, medial prefrontal cortex; mVN, medial visual network; R, right; \*  $P<0.05$ ; \*\*  $P<0.001$ .

Upon investigating potential susceptibility periods for FNC within the aDMN, we found the greatest correlation with UrbanSat during adolescence (age 13 to 15 years) (FWE-correction, voxel  $P<0.05$ , Figure 3C and see Supplementary Results). We confirmed the relation of UrbanSat with the FNC of the left mPFC within the aDMN in the IMAGEN participants at age 14 years (MNI-coordinate:  $x=0$ ,  $y=60$ ,  $z=24$ ; 104 voxels;  $F$  value peak=-5.61; Figure 3E) (FWE-correction, voxel  $P<0.05$ , cluster-size>100 voxels). Together, our data suggest a susceptibility window for the correlation of urbanicity and FNC within aDMN in adolescence. In the case of the mVN, we found the greatest correlation with UrbanSat from age 5 to 8 years, indicating a susceptibility window in childhood (Figure 3C).

In the resulting 136 between-network FNCs we found overall similarity of resting-state activity between CHIMGEN and IMAGEN (Supplementary Figure S2). For the 136 pairs of between-network FNCs, However, UrbanSat was significantly correlated with 42 connections in CHIMGEN, 19 connections in IMAGEN at age 19 and 27 connections in the same IMAGEN participants at age 14 (Figure 4A-C) ( $P<0.05$ ; to account for correlations in between-network connectivity we carried out 10000 permutations), suggesting a greater sensitivity to urbanicity in the Chinese CHIMGEN sample compared to the European IMAGEN sample. Five connections from six brain networks (aDMN, anterior default mode network; CBN, cerebellar network; ECN, executive control network; LN, language network; rFPN/lFPN, right or left frontal parietal network) were shared between CHIMGEN and IMAGEN: aDMN-CBN, aDMN-rFPN, aDMN-ECN, rFPN-LN and rFPN-lFPN (Figure 4D and Supplementary Table S2 and Figure S3). Whereas the susceptibility period for between-network connectivity involving self-referential thoughts<sup>22</sup> and executive control<sup>23</sup>, such as aDMN-CBN,

aDMN-rFPN, aDMN-ECN, and IFPN-rFPN was during adolescence (Figure 4E and Supplementary Results), between-network connectivity involving the language network LN-rFPN was most susceptible to urbanicity during childhood (Figure 4E and Supplementary Results). These results indicate that between-networks FNCs relate to urbanicity in both shared and distinct ways during brain development and in different socio-cultural and geographic locations.

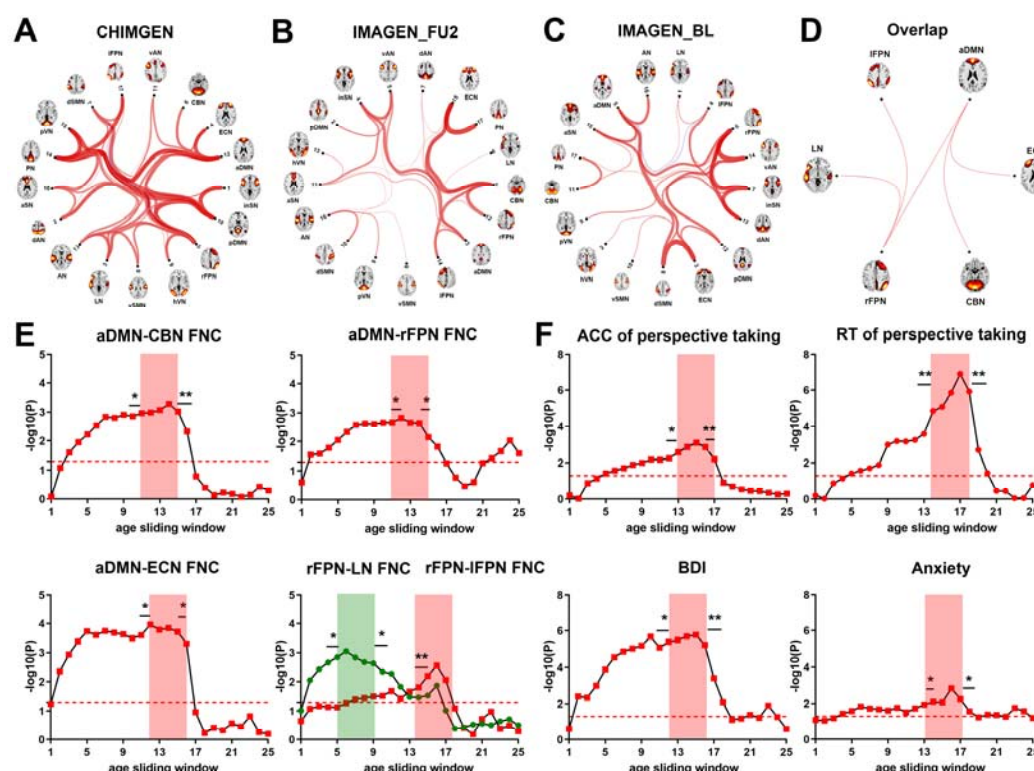

371

**Figure 4. Correlations of UrbanSat with between-networks FNCs and behaviors.** A. In the CHIMGEN study, UrbanSat was significantly correlated with 42 brain between-networks FNCs; B. In the IMAGEN FU2 study at age 19 years, UrbanSat was significantly correlated with 19 brain between-networks FNCs; C. In the IMAGEN BL study at age 14 years, UrbanSat was significantly correlated with 27 brain between-networks FNCs; D. Only five pairs of brain between-networks FNCs could be replicated in CHIMGEN and IMAGEN sample; E. The correlation of longitudinal UrbanSat on five overlapping brain between-networks FNCs was significantly increased in the childhood period (age 5 to 9 years in rFPN with LN) and adolescent period (age 11 to 15 years in aDMN with CBN, age 12 to 14 years in aDMN with rFPN, age 12 to 15 years in aDMN with ECN, and age 15 to 17 years in rFPN with IFPN) in the

CHIMGEN sample; *F*. In the CHIMGEN sample, the correlation of longitudinal UrbanSat with perspective taking performance was significantly increased in the adolescent period (age 13 to 16 years in accuracy and age 14 to 18 years in reaction time). The difference to the adjacent age bands was significant in accuracy ( $P=0.026$  compared to age 12 years and  $P=1.45\times 10^{-4}$  compared to age 17 years) and in reaction time ( $P=6.58\times 10^{-5}$  compared to age 13 years and  $P=1.16\times 10^{-6}$  compared to age 19 years); The correlation of longitudinal UrbanSat on mental health was significantly increased in the adolescent period (age 12 to 16 years in depressive severity and age 14 to 17 years in state anxiety). The difference to the adjacent age bands was significant in BDI ( $P=0.016$  compared to age 11 years and  $P=3.62\times 10^{-5}$  compared to age 17 years) and state anxiety ( $P=0.036$  compared to age 13 years and  $P=0.011$  compared to age 18 years). ACC, accuracy; aDMN, anterior default mode network; BDI, Beck Depression Inventory; CBN, cerebellar network; ECN, executive control network; FNC, functional connectivity; LN, language network; lFPN, left frontal parietal network; rFPN, right frontal parietal network; RSQ, Ruminating Scale Questionnaire; RT, reaction time; \*  $P<0.05$ ; \*\*  $P<0.001$ .

## The relation of UrbanSat with behavior

We investigated whether UrbanSat was correlated with measures of cognition and mental health-relevant behavior, in particular symptoms of depression and anxiety. Of the domains of neuropsychology, only one measure of social cognition, namely perspective taking, a measure of perceiving a situation or understanding a concept from an alternative point of view<sup>24</sup>, was significantly positively associated with UrbanSat (accuracy:  $r=0.124$ ,  $P=0.002$ ; reaction time,  $r=-0.245$ ,  $P=6.10\times 10^{-7}$ ; Table 1 and Supplementary Figure S4) (Bonferroni-correction  $P<0.05$ ). The correlation between UrbanSat and perspective taking performance was strongest during adolescence (age 13 to 16 years in accuracy and 14 to 18 years in reaction time). We confirmed the positive correlations between UrbanSat and perspective taking in IMAGEN at age 16 years ( $r=0.103$ ,  $P=0.009$ ), the earliest age these data were available (Figure 4F, Table 2 and Supplementary Figure S4). In the IMAGEN at age 19 years, we observed a trend-level significant correlation between UrbanSat and perspective taking ( $P=0.056$ ) (Table 2 and Supplementary Figure S4).

In CHIMGEN, UrbanSat was correlated with number of symptoms in the Beck Depressive Inventory (BDI) ( $r = 0.209$ ,  $P = 1.44 \times 10^{-5}$ ) and state anxiety ( $r = 0.132$ ,  $P = 0.001$ ) (Bonferroni  $P < 0.05$ ) (Table 1 and Supplementary Figure S4). The correlations between UrbanSat with BDI and state anxiety suggested greatest susceptibility during adolescence. (Figure 4F and Supplementary Results). In IMAGEN, we validated the correlation between UrbanSat and depressive symptoms at age 19 ( $r = 0.118$ ,  $P = 0.004$ ) using the Ruminating Scale Questionnaire (RSQ) (No depression questionnaire was available at age 14 or 16). There was no association between UrbanSat and anxiety at any timepoint in IMAGEN (Table 2 and Supplementary Figure S4).

#### Mediation of the correlation of UrbanSat with behavior by brain measures

We then investigated if left mPFC and cerebellar vermis volume, as well as the significant within- and between-network connectivity mediate the correlation of UrbanSat with perspective taking and symptoms of depression and anxiety.

In CHIMGEN, the correlation of UrbanSat with perspective taking was mediated by the left mPFC volume ( $P < 0.001$ ,  $r^2 = 0.20$ ), cerebellar vermis volume ( $P < 0.001$ ,  $r^2 = 0.15$ ), FNC within aDMN ( $P < 0.001$ ,  $r^2 = 0.12$ ) and VN ( $P < 0.001$ ,  $r^2 = 0.13$ ), as well as by the between network FNCs aDMN-CBN ( $P < 0.05$ ,  $r^2 = 0.10$ ), aDMN-rFPN ( $P < 0.001$ ,  $r^2 = 0.13$ ) (Figure 5A). In IMAGEN at age 16, the association of UrbanSat with perspective taking was also mediated by left mPFC volume ( $P < 0.05$ ,  $r^2 = 0.10$ ), FNC within the aDMN ( $P < 0.001$ ,  $r^2 = 0.36$ ), between network FNC aDMN-CBN ( $P < 0.001$ ,  $r^2 = 0.23$ ), aDMN-rFPN ( $P < 0.001$ ,  $r^2 = 0.20$ ) (Figure 5D). We did not find a mediation effect of the cerebellar vermis volume in the IMAGEN at age 16 ( $P = 0.26$ ).

In CHIMGEN, the correlation between UrbanSat and BDI was mediated by left mPFC volume ( $P < 0.001$ ,  $r^2 = 0.40$ ) and aDMN-ECN ( $P < 0.05$ ,  $r^2 = 0.12$ ) but not by the cerebellar vermis volume ( $P = 0.97$ ) (Figure 5B). Susceptibility to state anxiety was mediated by the left

medial frontal superior cortex volume ( $P < 0.001$ ,  $r^2 = 0.38$ ) as well as by cerebellar vermis volume ( $P < 0.001$ ,  $r^2 = 0.30$ ) (Figure 5C). In IMAGEN the correlation between UrbanSat and depressive symptoms was mediated by FNC within the aDMN ( $P < 0.05$ ,  $r^2 = 0.11$ ) and aDMN-ECN ( $P < 0.001$ ,  $r^2 = 0.25$ ) (Figure 5E), but not by the left mPFC ( $P = 0.09$ ) or by the cerebellar vermis ( $P = 0.16$ ).

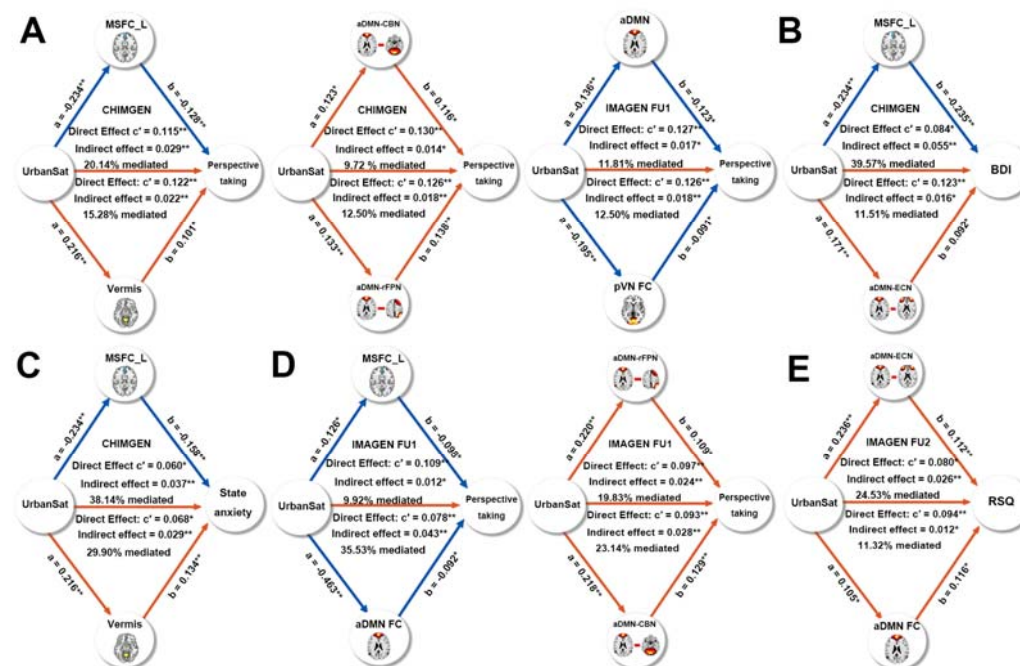

**Figure 5. Mediation analysis in the UrbanSat-brain-behaviour pathway.** A. In the CHIMGEN sample, the left mPFC and cerebellar vermis volume, FNC within the aDMN and the VN, as well as between-networks FNC of the aDMN and CBN and the aDMN and rFPN mediated the effect of UrbanSat on perspective taking performance; B. The left MPFC volume and between-networks FNC of the aDMN with ECN mediated the effect of UrbanSat on BDI; C. The left mPFC and cerebellar vermis volume mediated the effect of UrbanSat on state anxiety; D. In the IMAGEN FU1 assessment at 16 years, but not in the FU2 at 19 years, the effect of UrbanSat on perspective taking was mediated by the left MPFC volume, FNC within the aDMN, between-networks FNC of the aDMN with CBN and the aDMN with rFPN; E. In the IMAGEN FU2 assessment at 19 years, the effect of UrbanSat on RSQ was mediated by FNC within the aDMN, between-networks FNC of the aDMN with ECN. RSQ data were not available at IMAGEN BL sample at 14 years. aDMN, anterior default mode network; CBN, cerebellar network; ECN, executive control network; FNC, functional connectivity; FPN, frontal parietal

456 *network; BDI, Beck Depression Inventory; RSQ, Ruminating Scale Questionnaire; \*  $P < 0.05$ ;*  
 457 *\*\*  $P < 0.001$ .*

## 458 **Discussion**

459 Using innovative remote-sensing satellite data acquisition, we provide a comparative  
 460 characterization of the relation of urbanicity, brain structure and function, cognition and  
 461 behavior in large datasets of young people in China and Europe. We found shared correlations  
 462 of urbanicity with brain structure and function, as well as perspective taking, a measure of  
 463 social cognition, and symptoms of depression in Chinese CHIMGEN and European IMAGEN  
 464 sample. In contrast, correlations with anxiety were evident only in the Chinese sample. Brain  
 465 structure analyses revealed a negative correlation of urbanicity with volume of the mPFC, with  
 466 peaks in the dorsal (dmPFC) and ventral part (vmPFC) in Chinese and Europeans, respectively.  
 467 This correlation was significantly greater in adolescence, with strongest correlations at age 13  
 468 years. The mPFC mediated the effect of UrbanSat on perspective taking in CHIMGEN and  
 469 IMAGEN, and the effect on depression and anxiety in CHIMGEN, only. Reduction of mPFC  
 470 structure is implicated in responses to chronic stress<sup>25</sup> and pollution<sup>26</sup>, both associated with  
 471 urban living. The areas within the mPFC showing the greatest correlation with urbanicity in  
 472 CHIMGEN and IMAGEN, the dmPFC and vmPFC, are thought to be involved in social and  
 473 affective behavior<sup>27</sup>.

474 We also found a positive correlation of urbanicity with cerebellar vermis volume in both  
 475 Chinese and Europeans, with the strongest correlation during childhood at age 6. Lesions in the  
 476 vermis give rise to the ‘Cerebellar-Cognitive-Affective-Syndrome’, characterized by  
 477 impairments in executive function and memory, as well as affective behavior<sup>28</sup>. Animal studies  
 478 extend these findings to impairments in social behavior<sup>29</sup> and stress-dependent depressive  
 479 affect<sup>30</sup>, involving dopaminergic<sup>29</sup> and serotonergic<sup>30</sup> mechanisms, thus providing candidate  
 480 neurotransmitter systems for urbanicity investigations. Vermis volume mediates the effect of  
 481 urbanicity on perspective taking and anxiety in Chinese only, suggesting distinct structural



482 brain characteristics mediating urbanicity in China and Europe. Together, our findings relate  
 483 urbanicity to structural brain changes in regions linked to shared and distinct social and  
 484 affective behavior among individuals from different sociocultural conditions and geographical  
 485 locations. Our results are supported by reports of associations of urbanicity and prefrontal  
 486 cortex, in particular mPFC<sup>31</sup> and DLPFC<sup>32</sup>, in smaller European studies.

487 We used FNC of 17 resting-state networks related to cognitive and sensory-motor  
 488 processes to measure shared and distinct network connectivity in Chinese and Europeans. The  
 489 correlation of urbanicity with FNC within the aDMN was shared between CHIMGEN and  
 490 IMAGEN. FNC within the aDMN mediated the effect of UrbanSat on perspective taking, both  
 491 in CHIMGEN and IMAGEN, and on depressive symptoms in IMAGEN only. Similarly to  
 492 mPFC, FNC within the aDMN has been involved in social cognition<sup>33</sup> and depression<sup>34</sup>, and is  
 493 also moderated by urbanicity-related risk factors, including chronic stress<sup>35</sup> and air pollution<sup>36</sup>.  
 494 FNC within the mVN, which might be involved in the organization of cognitive function<sup>37</sup>, was  
 495 associated with urbanicity in CHIMGEN only, with a pronounced peak in susceptibility at the  
 496 age of 6 years. It also mediated the effect of urbanicity on perspective taking, again in  
 497 CHIMGEN only.

498 The resulting 136 between-network FNCs demonstrated overall similarity of resting-state  
 499 activity between CHIMGEN and IMAGEN (Supplementary Figure S2). Of note, urbanicity  
 500 was specifically correlated with 42 connections in CHIMGEN, 19 connections in IMAGEN at  
 501 age 19 and 27 connections in IMAGEN at age 14. Of the 5 between-network FNCs correlated  
 502 with urbanicity present in both CHIMGEN and IMAGEN, aDMN-ECN FNC mediated the  
 503 effect of UrbanSat on depressive symptoms in both samples. Consistent with the mPFC  
 504 structural and within FNC changes in the aDMN, FNC between aDMN and ECN have been  
 505 implicated in the emotional dysregulation of depression<sup>38</sup>. aDMN-rFPN FNC and aDMN-CBN  
 506 FNC, shown to be engaged in social cognition<sup>39,40</sup>, mediated the effect of UrbanSat on  
 507 perspective taking in both CHIMGEN and IMAGEN. It is possible that a combination of  
 508 structural changes in the mPFC and cerebellum account for this altered functional connectivity.

509 Together, they may mediate the relation of urbanicity with perspective taking. The majority of  
 510 between FNC associated with urbanicity was distinct between CHIMGEN and IMAGEN at age  
 511 19 and 14, however, indicating a specificity of between-network connectivity across  
 512 geographic locations as well as brain developmental stage. Furthermore, between-network  
 513 connectivity was increased in the Chinese sample, suggesting a greater sensitivity to urbanicity.  
 514 This might reflect the more drastic changes in urbanization in China compared to Europe<sup>41</sup>, but  
 515 may also relate to ethnically distinct genetic and environmental interactions, involving different  
 516 brain pathways<sup>42</sup>.

517 Whereas previous studies have investigated urban living before the age of 15 years<sup>43</sup>, our  
 518 characterization of specific age windows of increased susceptibility indicate discrete  
 519 neurodevelopmental periods during which brain development is sensitive to the effect of  
 520 urbanicity. The susceptibility period for the relation of urbanicity with mPFC-volume during  
 521 adolescence coincides with increased synaptic pruning, which depends (in part) on  
 522 environmental stimulation of neurons<sup>44</sup>. It is conceivable that adverse social situations that  
 523 elevate stress in an urban environment might result in accelerated synaptic pruning<sup>45</sup>, which  
 524 might also affect functional network connectivity. Among the shared between-network  
 525 connections, those that involve the aDMN and mediate perspective taking and depression show  
 526 increased susceptibility for urbanicity during adolescence. The susceptibility period of vermis  
 527 around age 6 years is consistent with the high volume increase of midline cerebellar structures  
 528 observed in this age group<sup>46</sup>. The fact that behavioral manifestations mediated by cerebellar  
 529 vermis are all associated with susceptibility windows during adolescence may indicate an early  
 530 neurobehavioral trajectory with delayed behavioral manifestation<sup>47</sup>.

531 In contrast to previous studies reporting an association of urbanicity with social and  
 532 cognitive impairments<sup>48</sup>, we find better performance of one social cognition variable,  
 533 perspective taking, in an urban environment. These previous findings were mostly derived from  
 534 samples at risk for schizophrenia<sup>48</sup>. As our cohorts were recruited from the general population,  
 535 it is possible that we detect an adaptive behavior to living in the city, which might be



536 compromised in patients at risk for psychosis, thus exacerbating their social difficulties and  
 537 isolation in an urban environment<sup>49</sup>. We are extending previous observations reporting an  
 538 increased incidence of depression and anxiety symptoms in urban settings<sup>50</sup>, by demonstrating  
 539 the stability of this observation in different geographical and sociocultural regions, and by  
 540 discovering possible underlying brain mechanisms.

541 Remote sensing satellites play a critical role in monitoring the Earth's surface and  
 542 atmosphere to track environmental conditions that are intimately related to human health<sup>51</sup>.  
 543 Satellites have been applied to map urbanization, poverty, climate change and pollution<sup>52</sup>, as  
 544 well as the spread of infectious disease<sup>53</sup>. By extending this approach to measuring the relation  
 545 of urbanicity with brain development, cognition and mental health, our study provides an  
 546 approach that might be useful to characterize and monitor the spatial and temporal patterns of  
 547 risk for mental disorders. Advances in resolution of satellite and computing power of  
 548 geographic system facilitate integration of remote-sensing environmental parameters with  
 549 public health data to develop models for disease surveillance and control. These models might  
 550 be useful for sustainable urban planning and policy, and to develop targeted prevention efforts  
 551 for young people in their unique environment. Our satellite measure of population density does  
 552 not capture with sufficient granularity important social environmental conditions resulting  
 553 from increased population density, such as social stress<sup>54</sup>, access to infrastructure and green  
 554 space<sup>55</sup> or crime<sup>56</sup>. Future studies will investigate the integrated effect of urban physical and  
 555 social environment, as well as the interaction with genetics and their relation to brain and  
 556 behavior. As our approach can be extended and generalized to other geographic locations and is

557 easy to implement even in the absence of detailed or directly comparable ground level data, it  
558 may be relevant for public health, policy and urban planning globally.

## 559 **Acknowledgments**

560 This work was partly supported by the National Key Research and Development Program of  
561 China (Grant No. 2018YFC1314301 and Grant No. 2017YFA0604401), the National Natural  
562 Science Foundation of China (Grant No. 81425013), the European Union-funded FP6  
563 Integrated Project IMAGEN (Reinforcement-related behaviour in normal brain function and  
564 psychopathology) (LSHM-CT- 2007-037286), the Horizon 2020 funded ERC Advanced Grant  
565 ‘STRATIFY’ (Brain network based stratification of reinforcement-related disorders) (695313),  
566 ERANID (Understanding the Interplay between Cultural, Biological and Subjective Factors in  
567 Drug Use Pathways) (PR-ST-0416-10004), BRIDGET (JPND: BRain Imaging, cognition  
568 Dementia and next generation GENomics) (MR/N027558/1), the FP7 project MATRICS  
569 (603016), the Medical Research Council Grant ‘c-VEDA’ (Consortium on Vulnerability to  
570 Externalizing Disorders and Addictions) (MR/N000390/1), the National Institute for Health  
571 Research (NIHR) Biomedical Research Centre at South London and Maudsley NHS  
572 Foundation Trust and King’s College London, the Bundesministerium für Bildung und  
573 Forschung (BMBF grants 01GS08152; 01EV0711; eMED SysAlc01ZX1311A;  
574 Forschungsnetz AERIAL 01EE1406A, 01EE1406B), the Deutsche Forschungsgemeinschaft  
575 (DFG grants SM 80/7-2, SFB 940/2), the Medical Research Foundation and Medical research  
576 council (grant MR/R00465X/1), the Human Brain Project (HBP SGA2). Further support was  
577 provided by grants from: ANR (project AF12-NEUR0008-01 - WM2NA, and

578 ANR-12-SAMA-0004), the Fondation de France, the Fondation pour la Recherche Médicale,  
 579 the Mission Interministérielle de Lutte-contre-les-Drogues-et-les-Conduites-Addictives  
 580 (MILDECA), the Assistance-Publique-Hôpitaux-de-Paris and INSERM (interface grant), Paris  
 581 Sud University IDEX 2012, the National Institutes of Health, Science Foundation Ireland  
 582 (16/ERCD/3797), U.S.A. (Axon, Testosterone and Mental Health during Adolescence; RO1  
 583 MH085772-01A1), NIH grant R01EB020407 and R01EB006841 and by NIH Consortium  
 584 grant U54 EB020403, supported by a cross-NIH alliance that funds Big Data to Knowledge  
 585 Centres of Excellence.

#### 586 **Competing interests**

587 The authors declare no competing interests.

588

## 589 **Methods**

### 590 **CHIMGEN and IMAGEN project**

591 In Chinese Imaging Genetics project (CHIMGEN), 7200 healthy Chinese Han participants of  
 592 18-30 ages with blood sample, environmental, structural and functional neuroimaging and  
 593 cognitive assessment were recruited from 29 centers of Chinese mainland 20 cities. In  
 594 IMAGEN study, the first European multisite and longitudinal project<sup>13</sup>, comprehensive  
 595 environmental factor, genetics, transcriptome, epigenetics, structural and functional  
 596 neuroimaging, neurocognitive measure and mental health outcome were collected from more  
 597 than 2000 14-year-old adolescents and 19-year-old follow up young adults.

### 598 **Remote sensing satellite data**

599 Global Human Settlement Layer (GHSL)<sup>14</sup>, Nighttime Lights (NL)<sup>15</sup>, Normalized Difference  
 600 Vegetation Index (NDVI)<sup>16</sup>, Normalized Difference Built-up Index (NDBI)<sup>17</sup>, Normalized  
 601 Difference Water Index (NDWI)<sup>18</sup> and global land cover mapping<sup>19</sup> were extracted from  
 602 Google Earth Engine to measure different urbanicity characteristics based on the acquired  
 603 individual geographic position from CHIMGEN (n=3306) and IMAGEN (n=1205)  
 604 (Supplementary Methods and Table S3-S5).

### 605 **Neuroimaging data**

606 In this study, 1104 subjects from CHIMGEN Tianjin main centers, and 1724 and 1423 subjects  
 607 from IMAGEN (at 14 years and 19 years, respectively) with available neuroimaging data were  
 608 included in the further analysis. In both studies, T1-weighted imaging, DTI and resting-state

functional imaging were acquired using 3.0 Tesla MRI scanners. Brain GMV from the T1-weighted scans, white matter tract based spatial statistics (TBSS) from the DTI and within and between functional network connectivity (FNC) from the resting-state functional imaging were calculated from preprocessed neuroimaging data (Supplementary Methods and Table S1). Only subjects where both quality-controlled neuroimaging data and remote sensing satellite data were available were included in the statistical analysis.

# **Neuropsychological assessment and mental health data**

Verbal learning memory, working memory, information processing speed, social cognition and executive control were included in the neuropsychological assessment, and depression and anxiety were included in mental health, in both CHIMGEN and IMAGEN (Supplementary Methods and Figure S5).

# **Statistical analysis**

To test the latent urbanicity variable derived from the satellite features, confirmatory factor analysis (CFA) was applied to the measuring satellite features using R package *lavaan*<sup>20</sup>. Only the closely correlated satellite features ( $r > 0.4$ ) were included in the CFA model used to construct a factor for urbanicity in China and Europe respectively, which we termed ‘UrbanSat’ (Supplementary Table S6). Population density is the measure currently typically used to map urbanicity processes in sociology<sup>21</sup>, so to consolidate our foundation of using satellite features to measure urbanicity, the UrbanSat was correlated with this “gold standard” ground-level population grid GHSL data from both China and Europe, separately (Supplementary Figure S6). The detailed statistical analysis of the relation between UrbanSat and brain GMV, fractional anisotropy (FA), within- and between- FNC of brain networks are described in the Supplementary Methods.

## 634 Tables

635 **Table 1. The correlation of UrbanSat with neuropsychological assessments and mental**  
636 **health in CHIMGEN sample (N = 622)**

| Domain                          | Scale                        | Test               | Item                           | Mean (SD)     | r value          | P value          |                  |
|---------------------------------|------------------------------|--------------------|--------------------------------|---------------|------------------|------------------|------------------|
| Neuropsychological test battery | Verbal learning memory       | CVLT               | Immediate free memory test 1-5 | 56.38 (8.36)  | 0.071            | 0.079            |                  |
|                                 |                              |                    | Short-term free memory         | 12.70 (2.29)  | -0.033           | 0.415            |                  |
|                                 |                              |                    | Short-term clue memory         | 12.94 (2.26)  | 0.028            | 0.484            |                  |
|                                 |                              |                    | Long-term free memory          | 13.12 (2.24)  | 0.002            | 0.956            |                  |
|                                 |                              |                    | Long-term clue memory          | 13.21 (2.22)  | 0.001            | 0.988            |                  |
|                                 |                              |                    | Long-term recognition ACC      | 0.99 (0.02)   | 0.009            | 0.830            |                  |
|                                 | Working memory               | N-back             | ACC in 1-back                  | 0.91 (0.08)   | 0.024            | 0.555            |                  |
|                                 |                              |                    | ACC in 3-back                  | 0.75 (0.14)   | 0.081            | 0.053            |                  |
|                                 | Information processing speed | SDMT               | Correct numbers in 90s         | 70.83 (11.35) | 0.035            | 0.383            |                  |
|                                 |                              |                    |                                |               |                  |                  |                  |
|                                 | Social cognition             | Ball tossing games | Perspective taking             | PT_ACC        | 0.25 (0.28)      | 0.124            | <b>0.002</b>     |
|                                 |                              |                    |                                | PT_RT (ms)    | 1030.51 (237.86) | -0.245           | <b>6.10x10-7</b> |
|                                 |                              |                    |                                | AG_ACC        | 0.02 (0.22)      | -0.011           | 0.778            |
|                                 |                              |                    | Agency                         | AG_RT (ms)    | 2.65 (287.37)    | -0.029           | 0.476            |
| Cognitive control               | Go-no go                     | ACC in Go trail    | 0.96 (0.09)                    | 0.044         | 0.071            |                  |                  |
|                                 |                              | ACC in No-go trail | 0.56 (0.18)                    | 0.071         | 0.079            |                  |                  |
| Mental health                   | Depressive scale             | BDI                | -                              | 2.33 (3.32)   | 0.209            | <b>1.44x10-5</b> |                  |
|                                 | Anxiety scale                | STAI               | State anxiety                  | 28.55 (6.20)  | 0.132            | <b>0.001</b>     |                  |
|                                 |                              |                    | Trait anxiety                  | 32.13 (6.44)  | 0.039            | 0.328            |                  |

637 ACC, accuracy; AG\_ACC, accuracy of agency trails; AG\_RT, reaction time of agency trails;  
638 BDI, Beck Depression Inventory; CVLT, California Verbal Learning Test; PT\_ACC, accuracy  
639 of perspective taking trails; PT\_RT, reaction time of perspective taking trails; RT, reaction  
640 time; SDMT, Symbol Digit Modalities Test; STAI, State and Trait Anxiety Inventory;  
641 *P* values in bold and italic indicate there are significant correlation between UrbanSat and  
642 domains  
643

644 **Table 2. The correlation of UrbanSat with IRI and mental health in IMAGEN sample**

| Scale                | Item               | N   | Mean (SD)     | <i>r</i> value | <i>P</i> value |
|----------------------|--------------------|-----|---------------|----------------|----------------|
| IRI FU1              | Empathic concern   | 636 | 16.17 (3.84)  | 0.022          | 0.574          |
|                      | Fantasy            | 636 | 17.08 (4.67)  | 0.030          | 0.457          |
|                      | Perspective taking | 636 | 17.96 (3.78)  | 0.103          | <b>0.009</b>   |
|                      | Personal distress  | 636 | 12.06 (3.81)  | -0.036         | 0.372          |
| IRI FU2              | Empathic concern   | 572 | 17.12 (4.67)  | 0.067          | 0.109          |
|                      | Fantasy            | 572 | 17.12 (3.79)  | -0.01          | 0.819          |
|                      | Perspective taking | 572 | 18.59 (3.90)  | 0.08           | 0.056          |
|                      | Personal distress  | 572 | 11.38 (3.82)  | 0.049          | 0.243          |
| Depressive scale FU2 | RSQ                | 575 | 37.90 (12.03) | 0.118          | <b>0.004</b>   |
| Anxiety scale FU2    | DAWBA-GA           | 842 | 1.43 (0.76)   | 0.059          | 0.122          |
|                      | CIDI-AS            | 813 | 1.26 (0.63)   | 0.035          | 0.320          |

645 CIDI-AS, Anxiety Screening from the Composite International Diagnostic Interview;  
646 DAWBA-GA, Generalized Anxiety Scale from The Development and Well-Being Assessment  
647 Interview; FU1, IMAGEN follow up 1 assessment acquired at 16 years; FU2, IMAGEN follow  
648 up 2 assessment acquired at 19 years; N, sample size; IRI, Interpersonal Reactivity Index; RSQ,  
649 Ruminating Scale Questionnaire; SD, stand deviation.

650

651

652



## 653     **References**

- 654     1. Prince M, Patel V, Saxena S, et al. No health without mental health. *The lancet* 2007; **370**(9590):  
655     859-77.
- 656     2. van Os J, Kenis G, Rutten BPJN. The environment and schizophrenia. 2010; **468**(7321): 203.
- 657     3. Kieling C, Baker-Henningham H, Belfer M, et al. Child and adolescent mental health worldwide:  
658     evidence for action. 2011; **378**(9801): 1515-25.
- 659     4. Bick J, Nelson CAJN. Early adverse experiences and the developing brain. 2016; **41**(1): 177.
- 660     5. Vlahov D, Galea S. Urbanization, urbanicity, and health. *Journal of urban health : bulletin of the*  
661     *New York Academy of Medicine* 2002; **79**(4 Suppl 1): S1-s12.
- 662     6. Heilig GK. World urbanization prospects: the 2011 revision. *United Nations, Department of*  
663     *Economic and Social Affairs (DESA), Population Division, Population Estimates and Projections*  
664     *Section, New York* 2012; **14**.
- 665     7. Lambert KG, Nelson RJ, Jovanovic T, Cerdá M. Brains in the city: neurobiological effects of  
666     urbanization. *Neuroscience & Biobehavioral Reviews* 2015; **58**: 107-22.
- 667     8. Nations U. 2018 revision of world urbanization prospects. United Nations New York; 2018.
- 668     9. Funk M, Drew N, Knapp M. Mental health, poverty and development. *Journal of public mental*  
669     *health* 2012; **11**(4): 166-85.
- 670     10. Jones PB. Adult mental health disorders and their age at onset. *The British Journal of Psychiatry*  
671     2013; **202**(s54): s5-s10.
- 672     11. Lederbogen F, Kirsch P, Haddad L, et al. City living and urban upbringing affect neural social stress  
673     processing in humans. *Nature* 2011; **474**(7352): 498.
- 674     12. Wulder MA, Masek JG, Cohen WB, Loveland TR, Woodcock CE. Opening the archive: How free  
675     data has enabled the science and monitoring promise of Landsat. *Remote Sensing of Environment* 2012;  
676     **122**: 2-10.
- 677     13. Schumann G, Loth E, Banaschewski T, et al. The IMAGEN study: reinforcement-related behaviour  
678     in normal brain function and psychopathology. *Molecular psychiatry* 2010; **15**(12): 1128-39.
- 679     14. Melchiorri M, Florczyk AJ, Freire S, Schiavina M, Pesaresi M, Kemper TJRS. Unveiling 25 Years  
680     of Planetary Urbanization with Remote Sensing: Perspectives from the Global Human Settlement Layer.  
681     2018; **10**(5): 768.
- 682     15. Zhou Y, Smith SJ, Zhao K, et al. A global map of urban extent from nightlights. 2015; **10**(5):  
683     054011.
- 684     16. Esau I, Miles VV, Davy R, Miles MW, Kurchatova AJAC, Physics. Trends in normalized  
685     difference vegetation index (NDVI) associated with urban development in northern West Siberia. 2016;  
686     **16**(15): 9563-77.
- 687     17. Zha Y, Gao J, Ni SJljors. Use of normalized difference built-up index in automatically mapping  
688     urban areas from TM imagery. 2003; **24**(3): 583-94.
- 689     18. McFeeters SK. The use of the Normalized Difference Water Index (NDWI) in the delineation of  
690     open water features. *International Journal of Remote Sensing* 1996; **17**(7): 1425-32.
- 691     19. Foley JA, Defries R, Asner GP, et al. Global consequences of land use. *Science* 2005; **309**(5734):  
692     570-4.

- 693 20. Rosseel YJ. Joss. Lavaan: An R package for structural equation modeling and more. Version 0.5–12  
694 (BETA). 2012; **48**(2): 1-36.
- 695 21. Montgomery MR. The urban transformation of the developing world. *Science* 2008; **319**(5864):  
696 761-4.
- 697 22. Greicius MD, Krasnow B, Reiss AL, Menon V. Functional connectivity in the resting  
698 brain: a network analysis of the default mode hypothesis. 2003; **100**(1): 253-8.
- 699 23. Seeley WW, Menon V, Schatzberg AF, et al. Dissociable intrinsic connectivity networks for  
700 salience processing and executive control. 2007; **27**(9): 2349-56.
- 701 24. Lamm C, Batson CD, Decety JJ. The neural substrate of human empathy: effects of  
702 perspective-taking and cognitive appraisal. 2007; **19**(1): 42-58.
- 703 25. Arnsten AF. Stress signalling pathways that impair prefrontal cortex structure and function.  
704 2009; **10**(6): 410.
- 705 26. Guxens M, Lubczynska MJ, Muetzel RL, et al. Air Pollution Exposure During Fetal Life, Brain  
706 Morphology, and Cognitive Function in School-Age Children. *Biological psychiatry* 2018; **84**(4):  
707 295-303.
- 708 27. Lieberman MD, Straccia MA, Meyer ML, Du M, Tan KM. Social, self, (situational), and affective  
709 processes in medial prefrontal cortex (MPFC): Causal, multivariate, and reverse inference evidence.  
710 *Neuroscience and biobehavioral reviews* 2019; **99**: 311-28.
- 711 28. Schmahmann JD, Sherman JC. The cerebellar cognitive affective syndrome. *Brain : a journal of*  
712 *neurology* 1998; **121** ( Pt 4): 561-79.
- 713 29. Carta I, Chen CH, Schott AL, Dorizan S, Khodakhah K. Cerebellar modulation of the reward  
714 circuitry and social behavior. *Science* 2019; **363**(6424).
- 715 30. Bambico FR, Comai S, Diwan M, et al. High frequency stimulation of the anterior vermis  
716 modulates behavioural response to chronic stress: involvement of the prefrontal cortex and dorsal raphe?  
717 *Neurobiology of disease* 2018; **116**: 166-78.
- 718 31. Besteher B, Gaser C, Spalthoff R, Nenadic I. Associations between urban upbringing and cortical  
719 thickness and gyrification. *Journal of psychiatric research* 2017; **95**: 114-20.
- 720 32. Haddad L, Schafer A, Streit F, et al. Brain structure correlates of urban upbringing, an  
721 environmental risk factor for schizophrenia. *Schizophr Bull* 2015; **41**(1): 115-22.
- 722 33. Li W, Mai X, Liu C. The default mode network and social understanding of others: what do brain  
723 connectivity studies tell us. *Frontiers in human neuroscience* 2014; **8**: 74.
- 724 34. Yan C-G, Chen X, Li L, et al. Reduced default mode network functional connectivity in patients  
725 with recurrent major depressive disorder. *PNAS* 2019; **116**(18): 9078-83.
- 726 35. Henckens MJ, van der Marel K, van der Toorn A, et al. Stress-induced alterations in large-scale  
727 functional networks of the rodent brain. *NeuroImage* 2015; **105**: 312-22.
- 728 36. Pujol J, Martinez-Vilavella G, Macia D, et al. Traffic pollution exposure is associated with altered  
729 brain connectivity in school children. *NeuroImage* 2016; **129**: 175-84.
- 730 37. Taylor P, Hobbs JN, Burroni J, Siegelmann HT. The global landscape of cognition: hierarchical  
731 aggregation as an organizational principle of human cortical networks and functions. *Sci Rep* 2015; **5**:  
732 18112.
- 733 38. Li W, Wang Y, Ward BD, Antuono PG, Li S-J, Goveas JS. Intrinsic inter-network brain  
734 dysfunction correlates with symptom dimensions in late-life depression. 2017; **87**: 71-80.

- 735 39. Cohn MD, Pape LE, Schmaal L, et al. Differential relations between juvenile psychopathic traits  
736 and resting state network connectivity. 2015; **36**(6): 2396-405.
- 737 40. Krienen FM, Buckner RLJ. Segregated fronto-cerebellar circuits revealed by intrinsic functional  
738 connectivity. 2009; **19**(10): 2485-97.
- 739 41. Yeh AG, Xu J, Liu K. China's post-reform urbanization: retrospect, policies and trends: IIED; 2011.
- 740 42. Tang Y, Zhao L, Lou Y, et al. Brain structure differences between Chinese and Caucasian cohorts:  
741 A comprehensive morphometry study. *Human brain mapping* 2018; **39**(5): 2147-55.
- 742 43. Lederbogen F, Kirsch P, Haddad L, et al. City living and urban upbringing affect neural social stress  
743 processing in humans. *Nature* 2011; **474**(7352): 498-501.
- 744 44. Fuhrmann D, Knoll LJ, Blakemore SJ. Adolescence as a Sensitive Period of Brain Development.  
745 *Trends in cognitive sciences* 2015; **19**(10): 558-66.
- 746 45. Selemon L, Zecevic NJTp. Schizophrenia: a tale of two critical periods for prefrontal cortical  
747 development. 2015; **5**(8): e623.
- 748 46. Sussman D, Leung RC, Chakravarty MM, Lerch JP, Taylor MJJB, behavior. The developing  
749 human brain: age-related changes in cortical, subcortical, and cerebellar anatomy. 2016; **6**(4): e00457.
- 750 47. Horton MK, Margolis AE, Tang C, Wright R. Neuroimaging is a novel tool to understand the  
751 impact of environmental chemicals on neurodevelopment. *Current opinion in pediatrics* 2014; **26**(2):  
752 230-6.
- 753 48. Weiser M, Van Os J, Reichenberg A, et al. Social and cognitive functioning, urbanicity and risk for  
754 schizophrenia. 2007; **191**(4): 320-4.
- 755 49. van Os J, Kenis G, Rutten BP. The environment and schizophrenia. *Nature* 2010; **468**(7321):  
756 203-12.
- 757 50. Peen J, Schoevers RA, Beekman AT, Dekker J. The current status of urban-rural differences in  
758 psychiatric disorders. *Acta psychiatrica Scandinavica* 2010; **121**(2): 84-93.
- 759 51. Seltenrich N. Remote-sensing applications for environmental health research. *Environmental*  
760 *health perspectives* 2014; **122**(10): A268-75.
- 761 52. Al-Hamdan MZ, Crosson WL, Economou SA, et al. Environmental Public Health Applications  
762 Using Remotely Sensed Data. *Geocarto international* 2014; **29**(1): 85-98.
- 763 53. Ford TE, Colwell RR, Rose JB, Morse SS, Rogers DJ, Yates TLJEID. Using satellite images of  
764 environmental changes to predict infectious disease outbreaks. 2009; **15**(9): 1341.
- 765 54. Milella M, Betz BJ, Knusel CJ, Larsen CS, Dori I. Population density and developmental stress in  
766 the Neolithic: A diachronic study of dental fluctuating asymmetry at Catalhoyuk (Turkey, 7,100-5,950  
767 BC). *American journal of physical anthropology* 2018; **167**(4): 737-49.
- 768 55. Mayor SJ, Schaefer JA. The many faces of population density. *Oecologia* 2005; **145**(2): 276-81.
- 769 56. Hanley QS, Lewis D, Ribeiro HV. Rural to Urban Population Density Scaling of Crime and  
770 Property Transactions in English and Welsh Parliamentary Constituencies. *PloS one* 2016; **11**(2):  
771 e0149546.

772
